# Supplementary material for: Diets of the Barents Sea cod ( Gadus morhua ) from the 1930s to 2018
Source: Copernicus journal article supplement (doi:10.5194/essd-13-1361-2021), 2021-03-29
Supplement: Supplementary file 1 [file essd-13-1361-2021-supplement.zip]

Archive with 4 entries (4 files):
- Townhill et al_Supplementary Material_2_Barents_Sea_Cod_Diet_Data_Information_revision.pdf
- Townhill et al_supplementary Material_1_Prey Category Information Sheet_revision.pdf
- Townhill et al_Supplementary Material_3_Russian data.pdf
- essd-13-1361-2021-supplement-title-page.pdf
