# Supplementary material for: Diets of the Barents Sea cod ( Gadus morhua ) from the 1930s to 2018
Source: Copernicus journal article supplement (doi:10.5194/essd-13-1361-2021), 2021-03-29
Supplement: Supplementary file 1 [file essd-13-1361-2021-supplement.zip › essd-13-1361-2021-supplement-title-page.pdf]

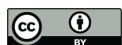

## *Supplement of*

# **Diets of the Barents Sea cod (*Gadus morhua*) from the 1930s to 2018**

**Bryony L. Townhill et al.**

*Correspondence to:* Bryony L. Townhill ([bryony.townhill@cefas.co.uk](mailto:bryony.townhill@cefas.co.uk))

- [essd-13-1361-2021-supplement-title-page.pdf](#)
- [Townhill et al\\_Supplementary Material\\_2\\_Barents\\_Sea\\_Cod\\_Diet\\_Data\\_Information\\_revision.pdf](#)
- [Townhill et al\\_Supplementary Material\\_3\\_Russian data.pdf](#)
- [Townhill et al\\_supplementary Material\\_1\\_Prey Category Information Sheet\\_revision.pdf](#)

The copyright of individual parts of the supplement might differ from the article licence.
