# Supplementary material for: Diets of the Barents Sea cod ( Gadus morhua ) from the 1930s to 2018
Source: Copernicus journal article supplement (doi:10.5194/essd-13-1361-2021), 2021-03-29
Supplement: Supplementary file 1 [file essd-13-1361-2021-supplement.zip › Townhill et al_supplementary Material_1_Prey Category Information Sheet_revision.pdf]

### **Supplementary Material 1: Prey Category Information**

Prey categorisations used for both IMR-PINRO and CEFAS data (Please note: These are the prey categories chosen for data analysis associated with the CoDINA: Cod: Diet and food web dyNAMics RCN project (No: 255460), prey categories can be changed for your own analyses and research purpose).

| <b>Scientific Name</b>              | <b>Prey Category</b> |
|-------------------------------------|----------------------|
| ABERRANTIDAE                        | Other food           |
| ACANTHOCEPHALA                      | Other food           |
| ACANTHOCHITONA CRINATA              | Other food           |
| ACARTIA CLAUSI                      | Other food           |
| ACTINIARIA                          | Other food           |
| ACTINIIDAE                          | Other food           |
| ADAMSIA PALLIATA                    | Other food           |
| AEGA PSORA                          | Other food           |
| AEGIDAE                             | Other food           |
| AEOLIDIA SPP                        | Other food           |
| AETIDEOPSIS ARMATA                  | Other food           |
| AGLANTHA DIGITALE                   | Other food           |
| AGONIDAE                            | Other fish           |
| AGONONIDA LONGIPES                  | Other food           |
| AGONUS                              | Other fish           |
| AGONUS CATAPHRACTUS                 | Other fish           |
| ALOSA                               | Herring              |
| AMBLYRAJA RADIATA                   | Other food           |
| AMMODYTES                           | Other fish           |
| AMMODYTES MARINUS                   | Other fish           |
| AMMODYTES SPP                       | Other fish           |
| AMMODYTIDAE                         | Other fish           |
| AMMODYTOIDEI                        | Other fish           |
| AMPELISCA                           | Other food           |
| AMPELISCA SPP                       | Other food           |
| AMPELISCIDAE                        | Other food           |
| AMPHARETIDAE                        | Other food           |
| AMPHIPODA                           | Other food           |
| AMPHOGONA APICATA                   | Other food           |
| ANAITIDES                           | Other food           |
| ANAITIDES (PHYLLODOCE) GROENLANDICA | Other food           |
| ANAITIDES (PHYLLODOCE) MACULATA     | Other food           |
| ANARHICHADIDAE                      | Other fish           |
| ANARHICHAS                          | Other fish           |
| ANARHICHAS DENTICULATUS             | Other fish           |
| ANARHICHAS DENTICULATUS(LATIFRONS)  | Other fish           |
| ANARHICHAS LUPUS                    | Other fish           |
| ANARHICHAS MINOR                    | Other fish           |
| ANARHICHAS SPP                      | Other fish           |
| ANGUILLIDAE                         | Other fish           |
| ANNELIDA                            | Other fish           |
| ANOMURA                             | Other food           |
| ANONYX                              | Other food           |
| ANONYX NUGAX                        | Other food           |
| ANTHOZOA                            | Other food           |
| ANTHOZOA                            | Other food           |
| ANTHURIDAE                          | Other food           |
| ARENICOLA MARINA                    | Other food           |
| APHRODITA ACULEATA                  | Other food           |
| APHRODITE ACULEATA                  | Other food           |

Townhill et al. Barents Sea cod diet data from the 1930s to the present day  
Supplementary Material 1

|                                  |             |
|----------------------------------|-------------|
| APHRODITIDAE                     | Other food  |
| APPENDICULARIA                   | Other food  |
| ARCA                             | Other food  |
| ARCHAEOGASTROPODA                | Other food  |
| ARCTINULA                        | Other food  |
| ARCTOGADUS                       | Polar cod   |
| ARCTOZENUS RISSO                 | Other fish  |
| ARCTURIDAE                       | Other food  |
| ARGENTINA                        | Other fish  |
| ARGENTINA SILUS                  | Other fish  |
| ARGENTINA SPHYRAENA              | Other fish  |
| ARGENTINIDAE                     | Other fish  |
| ARGYROPELECUS HEMIGYMNUS         | Other fish  |
| ARTEDIELLUS                      | Other fish  |
| ARTEDIELLUS ATLANTICUS           | Other fish  |
| ARTEDIELLUS ATLANTICUS EUROPAEUS | Other fish  |
| ARTEDIELLUS UNCINATUS            | Other fish  |
| ASCIDIACEA                       | Other food  |
| ASPIDOCHIROTIDA                  | Other food  |
| ASPIRIGLA CUCULUS                | Other fish  |
| ASTACOIDEA                       | Other food  |
| ASTARTE                          | Other food  |
| ASTARTE (TRIDONTA) BOREALIS      | Other food  |
| ASTARTE (TRIDONTA) MONTAGUI      | Other food  |
| ASTARTE CRENATA                  | Other food  |
| ASTARTE SULCATA                  | Other food  |
| ASTERIAS RUBENS                  | Other food  |
| ASTEROIDEA                       | Other food  |
| ASTEROIDEA                       | Other food  |
| ASTROPECTINIDAE                  | Other food  |
| ATELECYCLUS ROTUNDATUS           | Other food  |
| ATLANTOPANDALUS PROPINQVUS       | Euphausiids |
| AURELIA AURITA                   | Other food  |
| AVES                             | Other food  |
| BALANIDAE                        | Other food  |
| BALANOGLOSSUS CLAVIGERUS         | Other food  |
| BALANOMORPHA                     | Other food  |
| BATHYARCA GLACIALIS              | Other food  |
| BATHYPOLYPUS ARCTICUS            | Other food  |
| BATHYRAJA SPINICAUDA             | Other food  |
| BELONE BELONE                    | Other fish  |
| BENTHOS                          | Other food  |
| BENTHOSEMA GLACIALE              | Other fish  |
| BEROE(HORMIPHORA) CUCUMIS        | Other food  |
| BEROIDAE                         | Other food  |
| BIVALVIA                         | Other food  |
| BOLINOPSIS VITREA                | Other food  |
| BOREOGADUS SAIDA                 | Polar cod   |
| BRACHIOPODA                      | Other food  |
| BRACHYRHYNCHA                    | Other food  |
| BRACHYURA                        | Other food  |
| BRACHYURA-CANCRIIDEA             | Other food  |
| BRADA                            | Other food  |
| BRADA INHABILIS                  | Other food  |
| BRADYIDIUS SIMILIS               | Other food  |
| BROSME BROSME                    | Other fish  |
| BRYOZOA                          | Other food  |

Townhill et al. Barents Sea cod diet data from the 1930s to the present day  
Supplementary Material 1

|                           |             |
|---------------------------|-------------|
| BUCCINIDAE                | Other food  |
| BUCCINUM                  | Other food  |
| BUCCINUM UNDATUM          | Other food  |
| BYBLIS                    | Other food  |
| BYBLIS GAIMARDI           | Other food  |
| CALANIDAE                 | Other food  |
| CALANOIDA                 | Other food  |
| CALANUS                   | Other food  |
| CALANUS FINMARCHICUS      | Other food  |
| CALANUS GLACIALIS         | Other food  |
| CALANUS HYPERBOREUS       | Other food  |
| CALANUS SPP (ADULT)       | Other food  |
| CALANUS SPP (EGGS)        | Other food  |
| CALANUS SPP (NAUPLII)     | Other food  |
| CALIGUS                   | Other food  |
| CALIGUS SPP               | Other food  |
| CALLIANASSIDAE            | Shrimp      |
| CALLIONYMIDAE             | Other fish  |
| CALLIOPIDAE               | Hyperiid    |
| CAMPANULARIIDAE           | Other food  |
| CANCER PAGURUS            | Other food  |
| CANCRIDAE                 | Other food  |
| CANIFORMIA                | Other food  |
| CAPRELLA                  | Euphausiids |
| CAPRELLA LINEARIS         | Euphausiids |
| CAPRELLA MONOCERA         | Other food  |
| CAPRELLIDAE               | Euphausiids |
| CAPRELLIDEA               | Euphausiids |
| CARDIDAE                  | Other food  |
| CARDIUM                   | Other food  |
| CAREPROCTUS               | Other fish  |
| CAREPROCTUS REINHARDTI    | Other fish  |
| CARIDEA                   | Shrimp      |
| CEPHALOCHORDATA           | Other fish  |
| CEPHALOPODA               | Other food  |
| CEPHALOPODA-SEPIIDA       | Other food  |
| CERAMASTER GRANULARIS     | Other food  |
| CERIANTHUS LLOYDII        | Other food  |
| CESTODA                   | Other food  |
| CHACEON AFFINIS           | Other food  |
| CHAETOGNATHA              | Other food  |
| CHAETOPTERUS VARIOPEDATUS | Other food  |
| CHELICERATA               | Other food  |
| CHIONOECETES OPILIO       | Snow crab   |
| CHIRIDIUS ARMATUS         | Other food  |
| CHLAMYS                   | Other food  |
| CHLAMYS ISLANDICA         | Other food  |
| CHLAMYS OPERCULARIS       | Other food  |
| CHLAMYS VARIA             | Other food  |
| CHLOROPHYTA               | Other food  |
| CHRYSOPHYTA               | Other food  |
| CILIATA SEPTENTRIONALIS   | Other fish  |
| CIROLANA BOREALIS         | Other food  |
| CIROLANIDAE               | Other food  |
| CIRREPEDIA                | Other food  |
| CIRREPEDIA (LARVAE)       | Other food  |
| CIRRIPEDIA                | Other food  |

Townhill et al. Barents Sea cod diet data from the 1930s to the present day  
Supplementary Material 1

|                             |             |
|-----------------------------|-------------|
| CLADOCERA                   | Other food  |
| CLIONE LIMACINA             | Other food  |
| CLIONIDAE                   | Other food  |
| CLUPEA HARENGUS             | Herring     |
| CLUPEIDAE                   | Other fish  |
| CLUPEIDAE (EGGS)            | Other fish  |
| CLUPEIFORMES                | Herring     |
| CNIDARIA                    | Other food  |
| COLEOIDEA                   | Other food  |
| COLUS                       | Other food  |
| CONCHOECIA                  | Other food  |
| COPEPODA                    | Other food  |
| COPEPODA-CALANOIDA          | Other food  |
| COPEPODA-CALANOIDA (EGGS)   | Other food  |
| COROPHIIDAE                 | Hyperiid    |
| CORALLINA OFFICINALIS       | Other food  |
| CORYSTES CASSIVELAUNUS      | Other food  |
| COTTIDAE                    | Other fish  |
| COTTUNCULUS MICRIPS         | Other fish  |
| COTTUNCULUS SADKO           | Other fish  |
| COTTUS                      | Other fish  |
| COTTUS GOBIO                | Other fish  |
| CRANGON                     | Shrimp      |
| CRANGON ALLMANI             | Shrimp      |
| CRANGON CRANGON             | Shrimp      |
| CRANGONIDAE                 | Shrimp      |
| CRINOIDEA                   | Other food  |
| CRUSTACEA                   | Other food  |
| CRYPTONISCIDAE              | Other food  |
| CTENODISCUS CRISPATUS       | Other food  |
| CTENODISCUS SPP             | Other food  |
| CTENOPHORA                  | Other food  |
| CUCUMARIA                   | Other food  |
| CUCUMARIA FRONDOSA          | Other food  |
| CUCUMARIIDAE                | Other food  |
| CUMACEA                     | Other food  |
| CUMIDAE                     | Other food  |
| CYAMIDAE                    | Other food  |
| CYCLOPOIDA                  | Other food  |
| CYCLOPTERIDAE               | Other fish  |
| CYCLOPTERUS                 | Other fish  |
| CYCLOPTERUS LUMPUS          | Other fish  |
| CYLICHNA ALBA               | Other food  |
| DECAPODA                    | Other food  |
| DECAPODA REPTANTIA          | Other food  |
| DELECTOPECTEN GREENLANDICUS | Other food  |
| DENDROBRANCHIATA            | Euphausiids |
| DENDRONOTIDAE               | Other food  |
| DENTALIUM ENTALE            | Other food  |
| DIASTYLIDAE                 | Other food  |
| DIASTYLIS                   | Other food  |
| DIGESTED REMAINS            | NA          |
| DIPLOCIRRUS HIRSUTUS        | Other food  |
| ECHINODERMATA               | Other food  |
| ECHINOIDEA                  | Other food  |
| ECHINUS ACUTUS              | Other food  |
| ECHINUS ESCULENTUS          | Other food  |

Townhill et al. Barents Sea cod diet data from the 1930s to the present day  
Supplementary Material 1

|                          |             |
|--------------------------|-------------|
| ECHIURA                  | Other food  |
| ECHIURIDAE               | Other food  |
| ECHIURUS ECHIURUS        | Other food  |
| ECTOPROCTA               | Other food  |
| ECTOPROCTA/ BRYOZOA      | Other food  |
| ELEGINUS NAWAGA          | Codfishes   |
| ELOPOMORPHAA             | Other fish  |
| EMPTY                    | Empty       |
| ENCHELYOPUS CIMBRIUS     | Other fish  |
| ENTELURUS AEQUOREUS      | Other fish  |
| ENTEROGONA               | Other food  |
| EPICARIDEA               | Other food  |
| EPIZOANTHIDAE            | Other food  |
| ERYTHROPS ELEGANS        | Other food  |
| ERYTHROPS ERYTHROPTHALMA | Other food  |
| EUALUS GAIMARDII         | Euphausiids |
| EUCARIDA                 | Euphausiids |
| EUCHAETA                 | Other food  |
| EUCHAETA NORVEGICA       | Other food  |
| EUCHAETIDAE              | Other food  |
| EUCOPIIDAE               | Other food  |
| EUMICROTREMUS            | Other fish  |
| EUMICROTREMUS SPINOSUS   | Other fish  |
| EUNICIDAE                | Other food  |
| EUNOE SPP                | Butterfly   |
| EUPAGURUS BERNHARDUS     | Other food  |
| EUPHAUSIA                | Euphausiids |
| EUPHAUSIACEA             | Euphausiids |
| EUPHAUSIIDAE             | Euphausiids |
| EURYDICE PULCHRA         | Other food  |
| EUSIRIDAE                | Hyperiid    |
| EVADNE NORDMANNI         | Other food  |
| FEATHER                  | Other food  |
| FISH EGGS                | Other fish  |
| FISH LARVAE              | Other fish  |
| FLABELLIFERA             | Other food  |
| FORAMINIFERA             | Other food  |
| FORAMINIFERIDA           | Other food  |
| FUCALES                  | Other food  |
| FUCUS                    | Other food  |
| GADICULUS ARGENTEUS      | Codfishes   |
| GADIDAE                  | Cod         |
| GADIFORMES               | Cod         |
| GADUS                    | Cod         |
| GADUS MORHUA             | Cod         |
| GAIDROPSARUS             | Other fish  |
| GAIDROPSARUS VULGARIS    | Other fish  |
| GALATHEA                 | Other food  |
| GALATHEA SPP             | Other food  |
| GALATHEIDAE              | Other food  |
| GAMMARIDAE               | Hyperiid    |
| GAMMARIDEA               | Euphausiids |
| GAMMARUS                 | Hyperiid    |
| GAMMARUS LOCUSTA         | Hyperiid    |
| GAMMARUS WILKITZKII      | Hyperiid    |
| GASTEROSTEUS ACULEATUS   | Other fish  |
| GASTROPODA               | Other food  |

Townhill et al. Barents Sea cod diet data from the 1930s to the present day  
Supplementary Material 1

|                              |                          |
|------------------------------|--------------------------|
| GERYON                       | Other food               |
| GERYON AFFINIS               | Other food               |
| GERYON TRISPINOSUS           | Other food               |
| GERYONIDAE                   | Other food               |
| GIBBULA                      | Other food               |
| GLYCERA SPP                  | Other food               |
| GLYPTOCEPHALUS               | Flatfish                 |
| GLYPTOCEPHALUS CYNOGLOSSUS   | Flatfish                 |
| GNATHOSTOMATA                | Other fish               |
| GNATHOSTOMULIDA              | Other food               |
| GOBIIDAE                     | Other fish               |
| GOBIUS                       | Other fish               |
| GOBIUS SPP                   | Other fish               |
| GOLFINGIA MARGARITACEA       | Other food               |
| GOLFINGIA VULGARIS           | Other food               |
| GONATIDAE                    | Other food               |
| GONATUS                      | Other food               |
| GONATUS FABRICII             | Other food               |
| GORGONACEA                   | Other food               |
| GUT EVERTED/REGURGITATED     | Gut everted/regurgitated |
| GYMNAMMODYTES                | Other fish               |
| GYMNELUS                     | Other fish               |
| GYMNELUS BARSUKOVI           | Other fish               |
| GYMNELUS RETRODORSALIS       | Other fish               |
| GYMNOCANTHUS TRICUSPIS       | Other fish               |
| GYMNOSOMATA                  | Other food               |
| HAMINGIA ARCTICA             | Other food               |
| HAPTOPHYTA                   | Other food               |
| HARMOTHOE IMPAR              | Other food               |
| HAUSTORIIDAE                 | Hyperiid                 |
| HEMIARTHURUS SPP             | Other food               |
| HENRICIA                     | Other food               |
| HENRICIA OCULATA             | Other food               |
| HETAIRUS POLARIS             | Euphausiids              |
| HEXANCHIFORMES               | Other food               |
| HIPPOGLOSSOIDES              | Flatfish                 |
| HIPPOGLOSSOIDES PLATESSOIDES | Long rough dab           |
| HIPPOGLOSSUS                 | Flatfish                 |
| HIPPOGLOSSUS HIPPOGLOSSUS    | Flatfish                 |
| HIPPOLYTE VARIANS            | Shrimp                   |
| HIPPOLYTIDAE                 | Shrimp                   |
| HOLOTHUROIDEA                | Other food               |
| HOMARUS GAMMARUS             | Other food               |
| HOPLOCARIDA                  | Shrimp                   |
| HORMATHIA                    | Other food               |
| HORMATHIA DIGITATA           | Other food               |
| HORMATHIA NODOSA             | Other food               |
| HORMATHIIDAE                 | Other food               |
| HYALIDAE                     | Hyperiid                 |
| HYAS                         | Other food               |
| HYAS ARANEUS                 | Other food               |
| HYAS COARCTATUS              | Other food               |
| HYAS COARCTATUS              | Other food               |
| HYDROIDA (order)             | Other food               |
| HYDROIDOLINA                 | Other food               |
| HYDROZOA                     | Other food               |
| HYPERIA                      | Other food               |

Townhill et al. Barents Sea cod diet data from the 1930s to the present day  
Supplementary Material 1

|                           |                   |
|---------------------------|-------------------|
| HYPERIA GALBA             | Other food        |
| HYPERIIDAE                | Hyperiiids        |
| HYPERIIDAEA               | Hyperiiids        |
| ICELUS                    | Other fish        |
| ICELUS BICORNIS           | Other fish        |
| ICELUS SPATULA            | Other fish        |
| IDOTEA                    | Other food        |
| IDOTEA BALTHICA           | Other food        |
| IDOTEIDAE                 | Other food        |
| INACHUS                   | Other food        |
| INDETERMINATUS            | NA                |
| INSECT IV (DIPTERA)       | Other food        |
| ISOPODA                   | Other food        |
| ISOPOD (SPHAEROMATIDAE)   | Other food        |
| KINORHYNCHA               | Other food        |
| LAMPROPIDAE               | Other food        |
| LEBBEUS POLARIS           | Shrimp            |
| LENSIA CONOIDEA           | Other food        |
| LEPIDONOTUS SQUAMATUS     | Other food        |
| LEPTAGONUS DECAGONUS      | Other fish        |
| LEPTOCLINUS               | Other fish        |
| LEPTOCLINUS MACULATUS     | Other fish        |
| LETHENTERON CAMTSCHATICUM | Other fish        |
| LETHENTERON JAPONICUM     | Other fish        |
| LEUCOSIIDAE               | Other food        |
| LIMACINA                  | Other food        |
| LIMACINA HELICINA         | Other food        |
| LIMACINA RETROVERSA       | Other food        |
| LIMACINIDAE               | Other food        |
| LIMANDA                   | Flatfish          |
| LIMANDA LIMANDA           | Flatfish          |
| LIPARIDAE                 | Small arctic fish |
| LIPARIS                   | Small arctic fish |
| LIPARIS FABRICII          | Small arctic fish |
| LIPARIS LIPARIS           | Small arctic fish |
| LIPARIS SPP               | Other fish        |
| LIPARISCUS                | Small arctic fish |
| LITHODES                  | Other food        |
| LITHODES MAJA             | Other food        |
| LITHODIDAE                | Other food        |
| LITTORINA SPP             | Other food        |
| LOLIGINIDAE               | Other food        |
| LOLIGO SPP                | Other food        |
| LOPHIUS PISCATORIUS       | Other fish        |
| LUMBRINERIDAE             | Other food        |
| LUMBRINERIS FRAGILIS      | Other food        |
| LUMBRINERIS SPP           | Other food        |
| LUMPENUS                  | Other fish        |
| LUMPENUS FABRICII         | Other fish        |
| LUMPENUS LAMPRETAEFORMIS  | Other fish        |
| LYCAEIDAE                 | Other fish        |
| LYCENCHELYS               | Other fish        |
| LYCENCHELYS SARSI         | Other fish        |
| LYCODES                   | Other fish        |
| LYCODES ESMARKII          | Other fish        |
| LYCODES EUDIPLEUROSTICTUS | Other fish        |
| LYCODES GRACILIS          | Other fish        |

Townhill et al. Barents Sea cod diet data from the 1930s to the present day  
Supplementary Material 1

|                           |              |
|---------------------------|--------------|
| LYCODES PALLIDUS          | Other fish   |
| LYCODES POLARIS           | Other fish   |
| LYCODES RETICULATUS       | Other fish   |
| LYCODES ROSSI             | Other fish   |
| LYCODES SEMINUDUS         | Other fish   |
| LYCODES VAHLII            | Other fish   |
| LYSIANASSIDAE             | Other food   |
| MACOMA                    | Other food   |
| MACROPIPUS                | Other food   |
| MACROURIDAE               | Other food   |
| MACROURUS BERGLAX         | Other food   |
| MAERA LOVENI              | Hyperiids    |
| MAGNOLIOPHYTA             | Other food   |
| MAJIDAE                   | Other food   |
| MALACOSTRACA              | Other food   |
| MALDANIDAE                | Other food   |
| MALLOTUS VILLOSUS         | Capelin      |
| MARGARITES GROENLANDICUS  | Other food   |
| MAUROLICUS MUELLERI       | Other fish   |
| MEGANYCTIPHANES NORVEGICA | Euphausiids  |
| MELANOGRAMMUS             | Haddock      |
| MELANOGRAMMUS AEGLEFINUS  | Haddock      |
| MERLANGIUS MERLANGUS      | Codfishes    |
| MERLUCCIIDAE              | Codfishes    |
| MESOGASTROPODA            | Other food   |
| METRIDIA                  | Other food   |
| METRIDIA LONGA            | Other food   |
| METRIDIA LUCENS           | Other food   |
| METRIDIIDAE               | Other food   |
| METRIDIUM SENILE          | Other food   |
| MICRENOPHRYS LILLJEBORGI  | Other fish   |
| MICROMESISTIUS POUTASSOU  | Blue whiting |
| MICROSTOMUS KITT          | Flatfish     |
| MOLLUSC (LARVAE)          | Other food   |
| MOLLUSCA                  | Other food   |
| MOLPADIA BOREALIS         | Other food   |
| MUNIDA                    | Other food   |
| MUNIDA LONGIPES           | Other food   |
| MUNIDA SARSI              | Other food   |
| MUNNOPSIS TYPICA          | Other food   |
| MYA                       | Other food   |
| MYA ARENARIA              | Other food   |
| MYA SPP                   | Other food   |
| MYA TRUNCATA              | Other food   |
| MYCTOPHIDAE               | Other fish   |
| MYCTOPHIFORMES            | Other fish   |
| MYCTOPHUM PUNCTATUM       | Other fish   |
| MYIDAE                    | Other food   |
| MYOPSINA                  | Other food   |
| MYOXOCEPHALUS             | Other fish   |
| MYOXOCEPHALUS SCORPIUS    | Other fish   |
| MYOXOCEPHALUS SPP         | Other fish   |
| MYSIDA                    | Euphausiids  |
| MYSIDAE                   | Euphausiids  |
| MYSIS                     | Other food   |
| MYSIS MIXTA               | Other food   |
| MYTILUS EDULIS            | Other food   |

Townhill et al. Barents Sea cod diet data from the 1930s to the present day  
Supplementary Material 1

|                         |            |
|-------------------------|------------|
| MYXINE GLUTINOSA        | Other fish |
| NA                      | NA         |
| NATICA SPP              | Other food |
| N-DORIDOIDEA            | Other food |
| NEBALIA BIPES           | Other food |
| NEMATA                  | Other food |
| NEMATODA                | Other food |
| NEMERTEA                | Other food |
| NEMERTEA (LARVAE)       | Other food |
| NEOGASTROPODA           | Other food |
| NEPHROPS NORVEGICUS     | Other food |
| NEPHTYIDAE              | Other food |
| NEPHTYS                 | Other food |
| NEPHTYS CAECA           | Other food |
| NEPTUNEA                | Other food |
| NEREIDAE                | Other food |
| NEREIDIDAE              | Other food |
| NEREIS                  | Other food |
| NEREIS SPP              | Other food |
| NEROPHIS OPHIDION       | Other fish |
| NUCULA SPP              | Other food |
| NUCULOIDA               | Other food |
| NUCULOIDEA              | Other food |
| NUDIBRANCHIA            | Other food |
| NYMPHONIDAE             | Other food |
| OCTOCORALLIA            | Other food |
| OCTOPODA                | Other food |
| OCTOPODIDAE             | Other food |
| OCTOPUS VULGARIS        | Other food |
| OEGOPSINA               | Other food |
| OIKOPLEURA              | Other food |
| OIKOPLEURA SPP          | Other food |
| OIKOPLEURIDAE           | Other food |
| OITHONA HELGOLANDICA    | Other food |
| OMMASTREPHES SAGITTATUS | Other food |
| OMMASTREPHIDAE          | Other food |
| ONCHNESOMA SQUAMATUM    | Other food |
| ONUPHIDAE               | Other food |
| OPHIOCTEN SERICEUM      | Other food |
| OPHIOLEPIDIDAE          | Other food |
| OPHIOPHOLIS ACULEATA    | Other food |
| OPHIOPLEURA BOREALIS    | Other food |
| OPHIOSCOLEX GLACIALIS   | Other food |
| OPHIOTHRIX FRAGILIS     | Other food |
| OPHIURA                 | Other food |
| OPHIURA ROBUSTA         | Other food |
| OPHIURA SARSI           | Other food |
| OPHIURA SPP             | Other food |
| OPHIURIDA               | Other food |
| OPHIURIDA (ORDER)       | Other food |
| OPHIURIDAE              | Other food |
| OPHIUROIDEA             | Other food |
| ORBINIIDAE              | Other food |
| ORTHONECTIDA            | Other food |
| OSMERIDAE               | Other fish |
| OSMERUS EPERLANUS       | Other fish |
| OSTEICHTHYES            | Other fish |

Townhill et al. Barents Sea cod diet data from the 1930s to the present day  
Supplementary Material 1

|                              |             |
|------------------------------|-------------|
| OSTEICHTHYS – TELEOSTEI      | Other fish  |
| OSTRACODA                    | Other food  |
| OSTREOIDA                    | Other food  |
| OXYRHYNCHA                   | Other food  |
| PAGURIDAE                    | Other food  |
| PAGURUS                      | Other food  |
| PAGURUS BERNHARDUS           | Other food  |
| PAGURUS PUBESCENS            | Other food  |
| PALAEEMONIDAE                | Shrimp      |
| PANDALIDAE                   | Shrimp      |
| PANDALINA BREVIROSTRIS       | Euphausiids |
| PANDALUS                     | Shrimp      |
| PANDALUS BOREALIS            | Shrimp      |
| PANDALUS MONTAGUI            | Shrimp      |
| PANDALUS PROPINQUUS          | Shrimp      |
| PANDALUS SPP                 | Shrimp      |
| PANTOPODA                    | Other food  |
| PARAEUCHAETA NORVEGICA       | Other food  |
| PARALEPIDIDAE                | Other food  |
| PARALEPIS (NOTOLEPIS) RISSOI | Other fish  |
| PARALITHODES CAMTSCHATICUS   | Other food  |
| PARATHEMISTO ABYSSORUM       | Hyperiid    |
| PARATHEMISTO COMPRESSA       | Hyperiid    |
| PARATHEMISTO OBLIVIA         | Hyperiid    |
| PASIPHAEA                    | Euphausiids |
| PASIPHAEA MULTIDENTATA       | Shrimp      |
| PASIPHAEA SIVADO             | Shrimp      |
| PASIPHAEIDAE                 | Euphausiids |
| PATELLIDAE                   | Other food  |
| PAUROPODA                    | Other food  |
| PECTEN                       | Other food  |
| PECTINARIA                   | Other food  |
| PECTINIDAE                   | Other food  |
| PENAEOIDEA                   | Euphausiids |
| PENTAMERA CALCIGERA          | Other food  |
| PERCARIDA-ISOPODA            | Other food  |
| PETROMYZON MARINUS           | Other fish  |
| PETROMYZONTIDAE              | Other fish  |
| PHAEOPHYCEAE                 | Other food  |
| PHAEOPHYTA                   | Other food  |
| PHASCOLION STROMBI           | Other food  |
| PHYLLODOCIDAE                | Other food  |
| PLASTIC RUBBISH              | NA          |
| PLATYHELMINTHES              | Other food  |
| PLEUROBRACHIA PILEUS         | Other food  |
| PLEURONECTES                 | Flatfish    |
| PLEURONECTES PLATESSA        | Flatfish    |
| PLEURONECTIDAE               | Flatfish    |
| PLEURONECTIFORMES            | Flatfish    |
| PLEURONECTOIDEI              | Flatfish    |
| POLLACHIUS                   | Other fish  |
| POLLACHIUS VIRENS            | Other fish  |
| POLYCHAETA                   | Other food  |
| POLYCHAETA                   | Other food  |
| POLYNOIDAE                   | Other food  |
| POLYPHYSSIA CRASSA           | Other food  |
| POLYPLACOPHORA               | Other food  |

Townhill et al. Barents Sea cod diet data from the 1930s to the present day  
Supplementary Material 1

|                               |             |
|-------------------------------|-------------|
| PONTOPHILUS                   | Euphausiids |
| PONTOPHILUS NORVEGICUS        | Euphausiids |
| PONTOPHILUS SPINOSUS          | Euphausiids |
| PORIFERA                      | Other food  |
| PORTLANDIA ARCTICA            | Other food  |
| PORTLANDIA INTERMEDIA         | Other food  |
| PRAUNUS FLEXUOSUS             | Shrimp      |
| PRAUNUS INERMIS               | Shrimp      |
| PRIAPULA                      | Other food  |
| PRIAPULIDAE                   | Other food  |
| PRIAPULIS CAUDATUS            | Other food  |
| PRIAPULOPSIS BICAUDATUS       | Other food  |
| PRIAPULUS CAUDATUS            | Other food  |
| PROCESSIDAE                   | Shrimp      |
| PROTOZOA                      | Other food  |
| PSETTA MAXIMA                 | Flatfish    |
| PSEUDOCALANUS MINUTUS         | Shrimp      |
| PSILASTER ANDROMEDA           | Other food  |
| PSOLUS PHANTAPUS              | Other food  |
| PTERIINA                      | Other food  |
| PYCNOGONIDA                   | Other food  |
| PYCNOGONIDAE                  | Other food  |
| PYCNOGONUM LITTORALE          | Other food  |
| RAJA                          | Other food  |
| RAJA RADIATA                  | Other food  |
| RAJA SPP                      | Other food  |
| RAJA SPP (EGGS)               | Other food  |
| RAJELLA FYLLAE                | Other food  |
| RAJIDAE                       | Other food  |
| RAJIFORMES                    | Other food  |
| RANICEPS RANINUS              | Other fish  |
| REINHARDTIUS                  | Flatfish    |
| REINHARDTIUS HIPPOGLOSSOIDES  | Flatfish    |
| RHACHOTROPIS                  | Hyperiid    |
| RHACHOTROPIS ACULEATA         | Hyperiid    |
| RHACHOTROPIS MACROPUS         | Hyperiid    |
| RHODOPHYCEAE                  | Other food  |
| RHODOPHYTA                    | Other food  |
| ROCK/STONES                   | NA          |
| ROSSIA                        | Other food  |
| ROSSIA GLAUCOPIS              | Other food  |
| SABELLIDAE                    | Other food  |
| SABINEA                       | Euphausiids |
| SABINEA SARSII                | Euphausiids |
| SABINEA SEPTEMCARINATA        | Other food  |
| SADURIA                       | Other food  |
| SADURIA SABINI                | Other food  |
| SAGITTA (PARASAGITTA) ELEGANS | Other food  |
| SALMO SALAR                   | Other fish  |
| SALMONIDAE                    | Other fish  |
| SALMONIFORMES                 | Other fish  |
| SALPIDA                       | Other food  |
| SAND                          | NA          |
| SARCODINA                     | Other food  |
| SARS SHRIMP                   | Euphausiids |
| SCAPHOPODA                    | Other food  |
| SCINA BOREALIS                | Hyperiid    |

Townhill et al. Barents Sea cod diet data from the 1930s to the present day  
Supplementary Material 1

|                                  |             |
|----------------------------------|-------------|
| SCLERACTINIA                     | Other food  |
| SCLEROCRANGON                    | Shrimp      |
| SCLEROCRANGON BOREAS             | Shrimp      |
| SCLEROCRANGON FEROX              | Shrimp      |
| SCOMBER                          | Other fish  |
| SCOMBER SCOMBRUS                 | Other fish  |
| SCOPHTHALMUS                     | Flatfish    |
| SCORPAENIDAE                     | Other fish  |
| SCORPAENIFORMES                  | Other fish  |
| SCYLLARIDAE                      | Other food  |
| SCYPHOZOA                        | Other food  |
| SEBASTES                         | Redfish     |
| SEBASTES MARINUS                 | Redfish     |
| SEBASTES MENTELLA                | Redfish     |
| SEBASTES NORVEGICUS              | Redfish     |
| SEBASTES VIVIPARUS               | Redfish     |
| SEPIIDA                          | Other food  |
| SEPIOLA ATLANTICA                | Other food  |
| SEPIOLIDAE                       | Other food  |
| SERGESTES                        | Euphausiids |
| SERGESTES ARCTICUS               | Euphausiids |
| SERGESTIDAE                      | Euphausiids |
| SERRIPES GROENLANDICUS           | Other food  |
| SERTELLA BEANIANA                | Other food  |
| SERTULARIIDAE                    | Other food  |
| SIPHONOPHORA                     | Other food  |
| SIPUNCULA                        | Other food  |
| SIPUNCULIDAE                     | Other food  |
| SPHAEROMATIDAE                   | Other food  |
| SPIOCHAETOPTERUS TYPICUS         | Other food  |
| SPIRONTOCARIS                    | Euphausiids |
| SPIRONTOCARIS LILJEBORGII        | Euphausiids |
| SPIRONTOCARIS LILLJEBORGII       | Euphausiids |
| SPIRONTOCARIS SPINUS             | Euphausiids |
| SPIRONTOCARIS spp                | Euphausiids |
| SPIRONTOCARIS SPP                | Euphausiids |
| STEGOCEPHALIDAE                  | Hyperiid    |
| STEGOCEPHALUS                    | Hyperiid    |
| STEGOCEPHALUS INFLATUS           | Hyperiid    |
| STENOGLOSSA                      | Hyperiid    |
| STICHAEIDAE                      | Other fish  |
| STROMATEOIDEI                    | Other fish  |
| STRONGYLOCENTROTUS               | Other fish  |
| STRONGYLOCENTROTUS DROBACHIENSIS | Other food  |
| STYLEPHORUS                      | Other fish  |
| SYNGNATHIDAE                     | Other fish  |
| SYNGNATHOIDEI                    | Other fish  |
| SYRRHOE CRENULATA                | Other food  |
| SYSCENUS SPP                     | Shrimp      |
| TANAIDACEA                       | Euphausiids |
| TANAIDAE                         | Euphausiids |
| TAURULUS BUBALIS                 | Other fish  |
| TEALIA FELINA                    | Other food  |
| TELEOSTEI                        | Other fish  |
| TEMORA LONGICORNIS               | Other food  |
| TEMORIDAE                        | Other food  |
| TEREBELLIDAE                     | Other food  |

Townhill et al. Barents Sea cod diet data from the 1930s to the present day  
Supplementary Material 1

|                          |                   |
|--------------------------|-------------------|
| TEUTHIDA                 | Other food        |
| THALIACEA                | Other food        |
| THEMISTO                 | Hyperiiids        |
| THEMISTO ABYSSORUM       | Hyperiiids        |
| THEMISTO COMPRESSA       | Hyperiiids        |
| THEMISTO LIBELLULA       | Hyperiiids        |
| THYONIDIUM               | Other food        |
| THYSANOESSA              | Euphausiids       |
| THYSANOESSA INERMIS      | Euphausiids       |
| THYSANOESSA LONGICAUDATA | Euphausiids       |
| THYSANOESSA RASCHII      | Euphausiids       |
| TISBE FURCATA            | Other food        |
| TMETONYX                 | Other food        |
| TODARODES SAGITTATUS     | Other food        |
| TORPEDINIDAE             | Other food        |
| TREMATODA                | Other food        |
| TRIGLA SPP               | Small arctic fish |
| TRIGLIDAE                | Other fish        |
| TRIGLOPS                 | Small arctic fish |
| TRIGLOPS MURRAYI         | Small arctic fish |
| TRIGLOPS NYBELINI        | Small arctic fish |
| TRIGLOPS PINGELII        | Small arctic fish |
| TRISOPTERUS              | Codfishes         |
| TRISOPTERUS ESMARKI      | Codfishes         |
| TRISOPTERUS MINUTUS      | Codfishes         |
| TROCHIDAE                | Other food        |
| TUBEWORMS                | Other food        |
| TUNICATA                 | Other food        |
| TURRITELLA COMMUNIS      | Other food        |
| ULCINA OLRIKII           | Other food        |
| UNREADABLE               | NA                |
| VALVIFERA                | Other food        |
| VARIATUS PISCES          | Other fish        |
| VENEROIDA                | Other food        |
| VENUS SPP                | Other food        |
| XANTHOPHYTA              | Other food        |
| YOLDIELLA                | Other food        |
| ZEUGOPTERUS NORVEGICUS   | Flatfish          |
| ZOARCIDAE                | Other fish        |
| ZOARCOIDEI               | Other fish        |
| (other)                  | NA                |
| (Other)                  | NA                |
